# Supplementary material for: Predictive modeling of treatment resistant depression using data from STAR*D and an independent clinical study
Source: PLoS One. 2018 Jun 7;13(6):e0197268. doi: 10.1371/journal.pone.0197268 (PMC5991746; doi:10.1371/journal.pone.0197268)

Predictive Modeling of Treatment Resistant Depression using data from STAR*D and an Independent Clinical Study

Zhi Nie1,2, Srinivasan Vairavan3,4, Vaihbav A. Narayan3,4, Jieping Ye1,2, and Qingqin S. Li3,4,*

**Supporting Information:**

[**S3**](#OLE_LINK5) **Fig** ROC AUC for TRD as defined by **remission** status and **QIDS-SR16.** ROC curves in the training and test dataset (STAR*D) using full set of features, top n features and the overlapping features in all three datasets. (A-C STAR*D training data; D-F STAR*D test data; G RIS-INT-93 test data) where remission status was used to define TRD (STAR*D remission status was defined using QIDS-SR16 data, and RIS-INT-93 remission status was defined using HAM-D17)


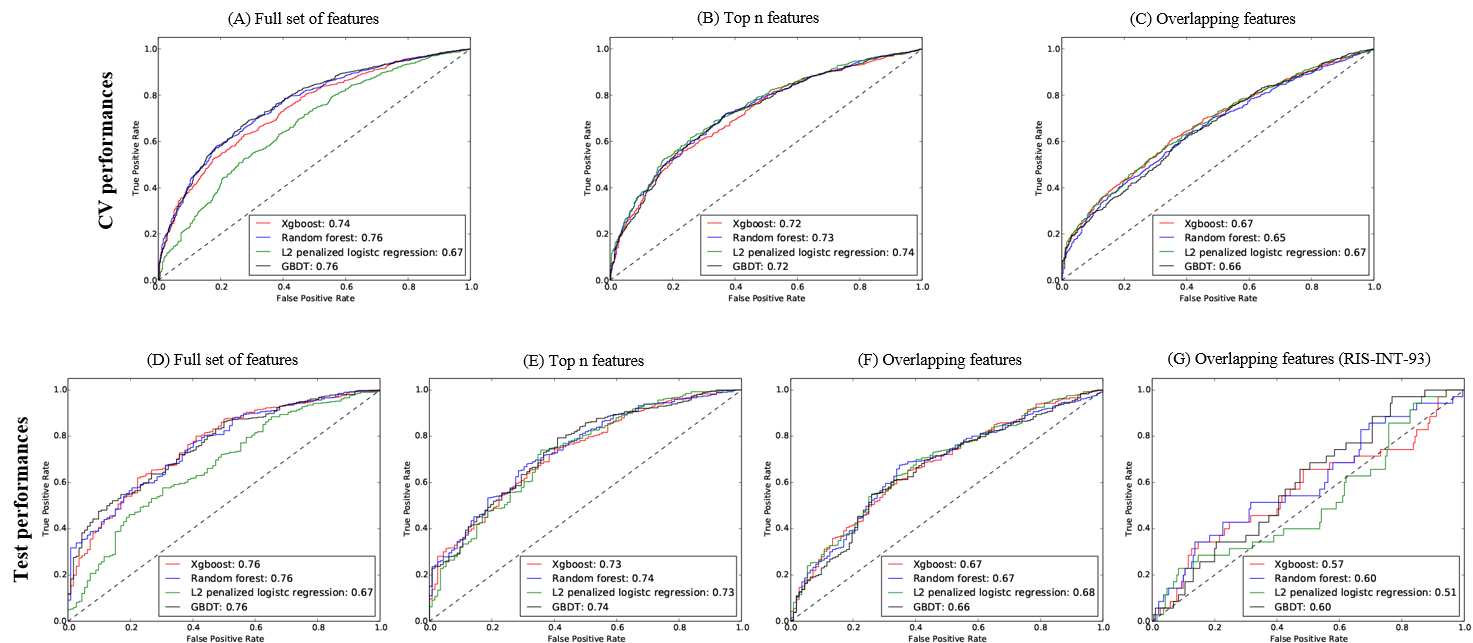

Supplement: S3 Fig — ROC curves in the training and test dataset (STAR*D) using full set of features, top n features and the overlapping features in all three datasets. (A-C STAR*D training data; D-F STAR*D test data; G RIS-INT-93 test data) where remission status was used to define TRD (STAR*D remission status was defined using QIDS-SR16 data, and RIS-INT-93 remission status was defined using HAM-D17). (DOCX) [file pone.0197268.s003.docx]
